# Supplementary material
Source: ML conference proceedings conference paper supplement (https://openaccess.thecvf.com/content/CVPR2021/html/Li_Dynamic_Slimmable_Network_CVPR_2021_paper.html)
Supplement: Supplementary file 1 [file Li_Dynamic_Slimmable_Network_CVPR_2021_supplemental.pdf]

# Dynamic Slimmable Network

## Supplementary Material

Changlin Li<sup>1</sup> Guangrun Wang<sup>2</sup> Bing Wang<sup>3</sup> Xiaodan Liang<sup>4</sup> Zhihui Li<sup>5</sup> Xiaojun Chang<sup>1\*</sup>

<sup>1</sup> GORSE Lab, Dept. of DSAI, Monash University <sup>2</sup> Univeristy of Oxford <sup>3</sup> Alibaba Group

<sup>4</sup> Sun Yat-Sen University <sup>5</sup> Shandong Artificial Intelligence, Qilu University of Technology

changlin.li@monash.edu, wanggrun@gmail.com, fengquan.wb@alibaba-inc.com,  
xdliang328@gmail.com, zhihuilics@gmail.com, xiaojun.chang@monash.edu

## Appendix

### A. Implementation Details

**Losses in Stage II.** Complexity penalty loss  $\mathcal{L}_{cplx}$  is used to increase the model efficiency in training stage II. To provide a stable and fair constraint, we use the number of multiply-adds on the fly,  $\text{MAdds}(\mathcal{X}, \theta)$ , as the metrics of model complexity. Specifically, the complexity penalty is given by:

$$\mathcal{L}_{cplx}(\mathcal{X}, \theta) = \left( \frac{\text{MAdds}(\mathcal{X}, \theta)}{\mathbf{T}} \right)^2, \quad (1)$$

where  $\mathbf{T}$  is a normalize factor set to the total MAdds of the supernet in our implementation. Note that this loss term always pushes the gate to route towards a faster architecture, towards an architecture with target MAdds, which can effectively prevent routing easy and hard instances to the same architecture.

Overall, the slimming gate can be optimized with a joint loss function:

$$\mathcal{L}(\mathcal{X}, \theta) = \lambda_1 \mathcal{L}_{cls} + \lambda_2 \mathcal{L}_{cplx} + \lambda_3 \mathcal{L}_{SGS}. \quad (2)$$

The three balancing factors are set to  $\lambda_1 = 1$ ,  $\lambda_2 = 0.5$ ,  $\lambda_3 = 1$  in our experiments. Different target MAdds is reached by adjusting the routing space during gate training. For instance, when training the gate of DS-MBNet-S, we set  $\rho \in [0.35 : 0.05 : 0.5]$  to prevent routing to heavier sub-networks.

**Equispaced channel group.** Following previous works [14, 13], we set the the smallest division of channel number to 8. When using 0.05 as the interval of  $\rho$ , rounding channels by 8 may result in different intervals, which could lead to training failure when using Group Normalization [11]. To prevent such problem, we always adopt a consistent interval (e.g. 8, 16, 32) in a single layer, instead of multiplying  $\rho$  and rounding the channel. This results in a difference of the slimming ratio between our implemented architecture and our design.

**Additional details.** Weight decay is set to  $1^{-4}$  in all of our experiments on ImageNet. To stabilize the optimization, weight decay of all the layers in the dynamic gate is removed. The weight  $\gamma$  of the last normalization layer of each residual block is initialized to zeros following [15]. The weight of the fully-connected layer in channel attention head,  $\mathbf{W}_3$  in Eqn. 9 of the main text, is also zero-initialized to ease the optimization following [12]. Additional training techniques include [2, 1]. We do **not** use label smoothing [7], DropPath [6] and RMSProp [10], which are popularly used in previous works [9, 4, 13, 14].

### B. Experiments on EfficientNet

We also applied our method on EfficientNet [9], a state-of-the-art network family with high efficiency. Similar to our DS-MBNet, **Dynamic Slimmable EfficientNet-B0 (DS-EffNet)** has only one slimming gate after its 8-th inverted residual block, controlling the rest 8 blocks. The fixed slimming ratio for the first 8 blocks is 0.5, while a uniform dynamic slimming ratio  $\rho \in [0.75 : 0.05 : 1.75]$  is used for the last 8 blocks. This supernet with 20 paths in total is trained with a similar config with the supernet of DS-ResNet and DS-MBNet.

We train the supernet with 512 total batch size using 0.2 learning rate that decays with a cosine scheduler in 150 epochs. To enable direct comparison, we opt to reproduce the EfficientNet results using our training setup, with a 150 epoch schedule and no extra enhancement of DropPath [6], RMSProp [10], etc.

The result is shown in Tab. 1. DS-EffNet outperforms the original EfficientNet-B0 by 0.7% and 0.8%, proving its efficacy on recent methods with inverted bottleneck blocks [8] and Squeeze-and-Excitation module [5].

### C. Additional Ablations

**Slimming gate.** We analysis the improvement brought by slimming gate by comparing the performance of DS-Net and its supernet. As shown in Tab. 2, slimming gate boosts the

\*Corresponding author.

Table 1. Comparison of EfficientNet-B0 and DS-EffNet on ImageNet.

| Method        |                        | MAdds | Top-1 Acc.  |
|---------------|------------------------|-------|-------------|
| 400M<br>MAdds | EffNet-B0 [9] (repro.) | 399M  | 76.0        |
|               | DS-EffNet-L (Ours)     | 400M  | <b>76.7</b> |
| 200M<br>MAdds | EffNet-B0 0.75× [9]    | 267M  | 74.6        |
|               | DS-EffNet-S (Ours)     | 270M  | <b>75.4</b> |

Table 2. Ablation analysis of slimming gate.

| model                | MAdds | Top-1 Acc. |
|----------------------|-------|------------|
| supernet (DS-MBNet)  | 140M  | 69.3       |
| DS-MBNet-S           | 153M  | 70.1       |
| supernet (DS-ResNet) | 1.1B  | 73.4       |
| DS-ResNet-S          | 1.2B  | 74.6       |

Table 3. Ablation analysis of distillation temperature  $\tau$  (40 epochs).

| $\tau$ | slimmest | widest |
|--------|----------|--------|
| 1      | 59.2     | 65.6   |
| 4      | 49.0     | 67.6   |

performance of DS-MBNet-S and DS-ResNet-S by 0.8% and 1.2% respectively, comparing to sub-networks with similar sizes in their supernet.

**Distillation temperature.** Temperature  $\tau$  in distillation loss was first introduced in [3] to control the smoothness of the target. Using a properly larger  $\tau$  usually yields better performance of the student. Surprisingly, we find a huge performance degradation in the slimmest sub-network when using larger  $\tau$  in in-place distillation. We test  $\tau = 4$  with DS-MBNet for 40 epochs and compare the it with the performance of default setting ( $\tau = 1$ ). As shown in Tab. 3, the performance of the slimmest sub-network decrease by 10.2% after applying the temperature  $\tau = 4$ .

## References

- [1] Ekin D Cubuk, Barret Zoph, Dandelion Mane, Vijay Vasudevan, and Quoc V Le. Autoaugment: Learning augmentation strategies from data. In *CVPR*, 2019. 1
- [2] Priya Goyal, Piotr Dollár, Ross Girshick, Pieter Noordhuis, Lukasz Wesolowski, Aapo Kyrola, Andrew Tulloch, Yangqing Jia, and Kaiming He. Accurate, large minibatch sgd: Training imagenet in 1 hour. *arXiv:1706.02677*, 2017. 1
- [3] Geoffrey E. Hinton, Oriol Vinyals, and Jeffrey Dean. Distilling the knowledge in a neural network. *arXiv:1503.02531*, 2015. 2
- [4] A. Howard, M. Sandler, Grace Chu, Liang-Chieh Chen, B. Chen, M. Tan, W. Wang, Y. Zhu, R. Pang, Vijay Vasudevan, Quoc V. Le, and H. Adam. Searching for mobilenetv3. In *ICCV*, 2019. 1
- [5] J Hu, L Shen, S Albanie, G Sun, and E Wu. Squeeze-and-excitation networks. *IEEE transactions on pattern analysis and machine intelligence*, 2019. 1
- [6] Gustav Larsson, Michael Maire, and Gregory Shakhnarovich. Fractalnet: Ultra-deep neural networks without residuals. In *ICLR*, 2017. 1
- [7] Gabriel Pereyra, George Tucker, Jan Chorowski, Łukasz Kaiser, and Geoffrey Hinton. Regularizing neural networks by penalizing confident output distributions. In *ICLR*, 2017. 1
- [8] Mark Sandler, Andrew G. Howard, Menglong Zhu, Andrey Zhmoginov, and Liang-Chieh Chen. Mobilenetv2: Inverted residuals and linear bottlenecks. In *CVPR*, 2018. 1
- [9] Mingxing Tan and Quoc V. Le. Efficientnet: Rethinking model scaling for convolutional neural networks. In *ICML*, 2019. 1, 2
- [10] Tijmen Tieleman and Geoffrey Hinton. Lecture 6.5-rmsprop: Divide the gradient by a running average of its recent magnitude. *COURSERA: Neural networks for machine learning*, 4(2):26–31, 2012. 1
- [11] Yuxin Wu and Kaiming He. Group normalization. In *ECCV*, 2018. 1
- [12] Zongxin Yang, Linchao Zhu, Yu Wu, and Yi Yang. Gated channel transformation for visual recognition. In *CVPR*, 2020. 1
- [13] Jiahui Yu and Thomas Huang. Autoslim: Towards one-shot architecture search for channel numbers. *arXiv:1903.11728*, 2019. 1
- [14] Jiahui Yu and Thomas S. Huang. Universally slimmable networks and improved training techniques. In *ICCV*, 2019. 1
- [15] Jiahui Yu, Pengchong Jin, Hanxiao Liu, Gabriel Bender, Pieter-Jan Kindermans, Mingxing Tan, T. Huang, Xiaodan Song, and Quoc V. Le. Bignas: Scaling up neural architecture search with big single-stage models. In *ECCV*, 2020. 1
